# Supplementary material
Source: PubMed Central journal article supplement (PMC8678947)
Supplement: AET2-5-e10717-s001.pdf [file AET2-5-e10717-s001.pdf]

# **Joan Smith, DO**

Current Date

Address

Phone

Email@Email.com

---

## **EDUCATION**

### **Graduate**

**2006 – 2010**            **Medical School, City, State**  
**Doctor of Medicine**

**2003 – 2006**            **Undergraduate University, City, State**  
**Major**  
**Minor(s)**  
*Summa Cum Laude*

### **Postgraduate**

**2014 – 2015**            **Hospital, City, State**  
**Fellowship**

**2010 - 2014**            **Hospital, City, State**  
**Residency**

**LEADERSHIP TRAINING**

**2021**                      **Society for Academic Emergency Medicine Advanced Research  
Methods, Evaluation, and Design (ARMED)**

**2020**                      **SAEM ARMED MedEd**

**2019**                      **SAEM Leadership Program**

**ACADEMIC APPOINTMENTS**

**2020 – Present**            **Associate Professor  
Hospital, City, State**

**2016 – 2020**              **Assistant Professor  
Hospital, City, State**

**2015 – 2016**              **Clinical Instructor  
Hospital, City, State**

**EMPLOYMENT**

**2015 – Present**            **Consultant Emergency Physician  
Other Hospital, City, State**

**2015 – Present**            **Emergency Physician  
Hospital, City, State**

**2013 – 2015**              **Relevant Other Job  
Company, City, State**

**HONORS AND AWARDS**

|             |                                                |
|-------------|------------------------------------------------|
| <b>2021</b> | <b>Best Teacher</b>                            |
| <b>2020</b> | <b>Best Abstract, Local School of Medicine</b> |
| <b>2019</b> | <b><i>Journal</i>, Top Reviewer</b>            |
| <b>2018</b> | <b>Other Award</b>                             |

**CERTIFICATION AND LICENSURE**

|                       |                                                        |
|-----------------------|--------------------------------------------------------|
| <b>2016 – Present</b> | <b>Diplomate, American Board of Emergency Medicine</b> |
| <b>2016 – Present</b> | <b>Advanced Cardiac Life Support, Instructor</b>       |
| <b>2010 – Present</b> | <b>Advanced Trauma Life Support, Provider</b>          |
| <b>2010 – Present</b> | <b>Basic Life Support, Instructor</b>                  |
| <b>2010 – Present</b> | <b>Pediatric Advanced Life Support, Instructor</b>     |
| <b>2010 – Present</b> | <b>State Medical License</b>                           |

**SOCIETY MEMBERSHIPS**

**American Academy of Emergency Medicine (AAEM)**  
**American College of Emergency Physicians (ACEP)**  
**Council of Residency Directors in Emergency Medicine (CORD)**  
**Society for Academic Emergency Medicine (SAEM)**

**TEACHING**

**Local University**

**2017 – Present**      **Department Faculty Development Program, Course Director**  
35 Emergency Medicine physicians, two four-hour sessions per year  
Total Contact Hours: 8 hours per year

**2015 – Present**      **Clinical Transitions, Assistant Course Director**  
160 Fourth-year medical students, 10 one-hour sessions per year  
Total Contact Hours: 10 hours per year

**Regional and National Courses**

**2018 – Present**      **Regional College of Emergency Physicians Nerve Block Course, Course Director**  
40 Emergency Medicine physicians, four sessions per year  
Contact Hours: 16 hours per year

**LEADERSHIP AND COMMITTEE INVOLVEMENT**

**Institutional or Departmental Leadership Positions**

- 2018 – Present      Residency Program Director  
Hospital, City, State**
- 2016 – Present      Clinical Competency Committee Chair  
Hospital, City, State**

**Leadership Positions in Professional Societies**

- 2020 – Present      Major Society #1, Research Subcommittee Chair**
- 2018 – 2020          Major Society #2, Scholarship Chair**
- 2017 – 2018          Major Society #3, President**

**Membership Roles in Professional Societies**

- 2020 – Present      Major Society #1 Education Committee, Member**
- 2020 – Present      Major Society #2 Research Committee, Member**

**MENTORSHIP**

Alexander Mentee, MD

*2020-Present; Current Role, Current Institution*

Ashanti Mentee, DO

*2019-Present; Former Role and Current Role, Current Institution*

Ashif Mentee, MPH

*2018-Present; Former Role and Current Role, Current Institution*

Ashlea Mentee, MD

*2018-Present; Current Role, Current Institution*

**SCIENTIFIC AND SCHOLARLY ACTIVITIES**

**Research Impact**

**Total Publications: 1**

**Total Citations: 35**

**H-index: 1**

**i-10 index: 1**

**Editor for Professional Journals**

**2019 – Present**      *Academic Emergency Medicine*, Decision Editor

**2018 – Present**      *Academic Emergency Medicine Education and Training*, Decision Editor

**Reviewer for Professional Journals**

**2021 – Present**      *Western Journal of Emergency Medicine*

**2020 – Present**      *Academic Emergency Medicine*

**2019 – Present**      *Academic Emergency Medicine Education and Training*

**Reviewer for Granting Agencies**

**2021**                      **Association for Medical Education in Europe (AMEE) Research Grant**

**2020**                      **Emergency Medicine Foundation (EMF) Education Grant**

**Research Funding**

**2020 – Present**      **EMF/SAEM Education Grant (\$50,000)**

*A Novel Approach to Residency Training Using A New Technology*

**Role: Primary Investigator**

### **Poster presentations**

1. **Smith J**, Author A, Author B, Author C, Author D. A Novel Curriculum for CV Preparation Among Emergency Medicine Residents. Poster session presented at: Society for Academic Emergency Medicine 2021 Scientific Assembly; 2021 May 11-14; virtual.
2. **Smith J**, Author A, Author B, Author C, Author D. A Novel Curriculum for Cover Letter Preparation Among Emergency Medicine Residents. Poster session presented at: Society for Academic Emergency Medicine 2019 Scientific Assembly; 2019 May 14-17; Las Vegas, NV.

### **Peer Reviewed Manuscripts**

1. **Smith J**, Author A, Author B, Author C, Author D. A Novel Curriculum for CV Preparation Among Emergency Medicine Residents. *AEM Educ Train*. 2021 Sept 1. doi: xxx.

### **Book Chapters**

1. **Smith J**. CV Preparation. In: Editor A, eds. *Guidebook for Academic Medicine*. Chicago, IL: McGraw-Hill Education, 2018.

### **Blog Posts**

1. **Smith J**. (October 5, 2021). Preparing Your CV: A Guide for Physicians [Blog post]. Retrieved from: [www.emergencymedicineresidentwebsite.com/cvpreparation](http://www.emergencymedicineresidentwebsite.com/cvpreparation)



**Invited Presentations at Regional, National, and International Meetings**

**5/2021**      **Invited Speaker and Workshop Leader**  
**Society for Academic Emergency Medicine**  
**2021 Scientific Assembly**  
*Virtual Session*

**Description:**

30 Emergency Medicine Student, Resident, and Faculty Attendees

Contact Hours: 1 hour

Topic: *Creating a High-Quality Curriculum Vitae and Educator's Portfolio*

**Local Presentations and Lectures**

**4/2021**      **Invited Speaker**  
**Local University**  
**Emergency Medicine Residency**  
*Virtual Session*

**Description:**

36 Emergency Medicine Residents

Contact Hours: 1 hour

Topic: *Teaching on Shift in the Emergency Department*

**Podcasts and Webinars**

**8/2021**      **Emergency Medicine Podcast**  
“Creating a CV – A Guide for Medical Students and Residents”  
Available at: [www.empodcast.com/CVguide](http://www.empodcast.com/CVguide).

**REFERENCES**

**Bailey Mentor, MD, MPH**

Professor and Chair  
Department of Emergency Medicine  
University  
123 Fourth Street  
City, State, Zip Code  
312-555-5555  
Bailey\_Mentor@email.com

**Barbara Mentor, DO, MS**

Professor and Vice Chair of Academics  
Department of Emergency Medicine  
University  
123 Fourth Street  
City, State, Zip Code  
312-555-5555  
Barbara\_Mentor@email.com

**Bai Mentor, MD**

Assistant Professor and Assistant Dean  
Department of Emergency Medicine  
University  
123 Fourth Street  
City, State, Zip Code  
312-555-5555  
Bai\_Mentor@email.com
